# Supplementary material for: COVID-19 Severity and Neonatal BCG Vaccination among Young Population in Taiwan
Source: MDPI journal article supplement (doi:10.3390/ijerph18084303), 2021-04-18
Supplement: s1 [file s1]

Table S1: Sex distribution in clinical Syndromes associated with COVID-19 stratified by participant's Tokyo-172 BCG vaccination status among age 4-24 years and 25-33 years between January 21 and March 19 2021 in Taiwan.

| Female     |                                          |      |          |        |          |       |    |                                       |      |          |        |          |       |
|------------|------------------------------------------|------|----------|--------|----------|-------|----|---------------------------------------|------|----------|--------|----------|-------|
| Birth year | Without neonatal BCG vaccination records |      |          |        |          |       |    | With neonatal BCG vaccination records |      |          |        |          |       |
|            | Asymptomatic                             | Mild | Moderate | Severe | Critical | Total |    | Asymptomatic                          | Mild | Moderate | Severe | Critical | Total |
| 1996-2016  | 0                                        | 2    |          | 0      | 0        | 0     | 2  | 4                                     | 57   |          | 13     | 1        | 76    |
| 1986-1995  | 2                                        | 38   |          | 8      | 1        | 0     | 49 | 4                                     | 34   |          | 7      | 0        | 45    |
| Total      | 2                                        | 40   |          | 8      | 1        | 0     | 51 | 8                                     | 91   |          | 20     | 1        | 121   |

| Male       |                                          |      |          |        |          |       |    |                                       |      |          |        |          |       |
|------------|------------------------------------------|------|----------|--------|----------|-------|----|---------------------------------------|------|----------|--------|----------|-------|
| Birth year | Without neonatal BCG vaccination records |      |          |        |          |       |    | With neonatal BCG vaccination records |      |          |        |          |       |
|            | Asymptomatic                             | Mild | Moderate | Severe | Critical | Total |    | Asymptomatic                          | Mild | Moderate | Severe | Critical | Total |
| 1996-2016  | 0                                        | 4    |          | 0      | 0        | 0     | 4  | 11                                    | 39   |          | 11     | 1        | 62    |
| 1986-1995  | 5                                        | 45   |          | 7      | 0        | 0     | 57 | 2                                     | 23   |          | 8      | 0        | 33    |
| Total      | 5                                        | 49   |          | 7      | 0        | 0     | 61 | 13                                    | 62   |          | 19     | 1        | 95    |
